# Supplementary material
Source: MDPI journal article supplement (https://www.mdpi.com/2077-1312/11/9/1670)
Supplement: s1 [file s1]

**Table S1.** Results from the regression analyses between the dietary mussel meal content and the performance indicators of *L. vannamei*.

| Performance indicator | p-value | Quadratic model                    | x-Max | R <sup>2</sup> |
|-----------------------|---------|------------------------------------|-------|----------------|
| Final weight          | 0.012   | $y = -0.321x^2 + 1.123x + 18.689$  | 1.75  | 0.407          |
| Weight gain           | 0.013   | $y = -8.973x^2 + 31.21x + 432.139$ | 1.74  | 0.401          |
| Weekly weight gain    | 0.010   | $y = -0.04x^2 + 0.14x + 1.898$     | 1.75  | 0.418          |
| Productivity          | 0.005   | $y = -0.037x^2 + 0.147x + 1.742$   | 1.99  | 0.459          |
| Relative growth rate  | 0.013   | $y = -0.030x^2 + 0.104x + 3.093$   | 1.73  | 0.399          |
| Survival              | 0.300   | $y = -0.357x^2 + 2.304x + 93.161$  | 3.23  | 0.132          |
| Feed intake           | 0.067   | $y = -0.169x^2 + 0.938x + 17.513$  | 2.78  | 0.272          |
| Feed conversion rate  | 0.019   | $y = 0.014x^2 - 0.056x + 1.245$    | 2.00  | 0.371          |
